# Supplementary figures and images for: Do deaths from road traffic injuries follow a classical trimodal pattern in North West Ethiopia? A hospital-based prospective cohort study
Source: HighWire-hosted journal article supplement (doi:10.1136/bmjopen-2021-051017), 2021-12-01

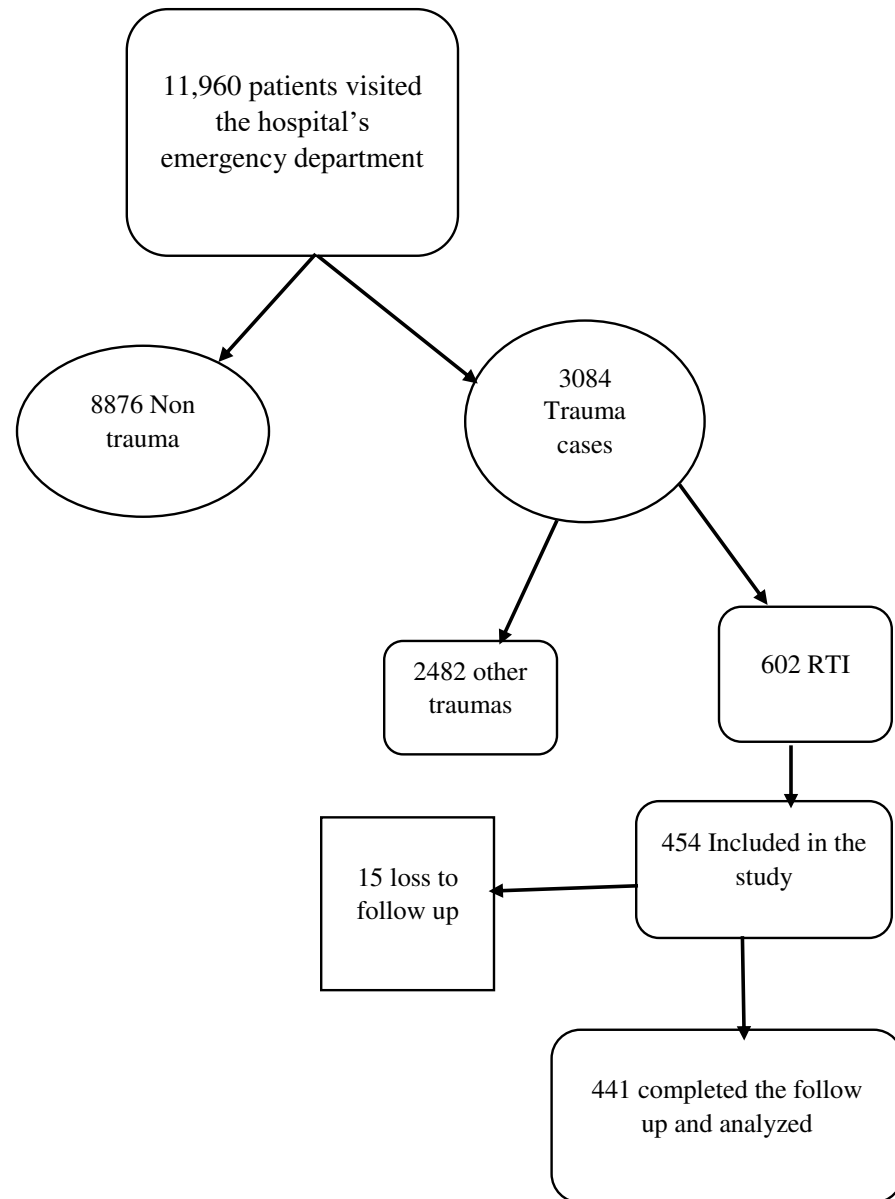

Figure 1: Schematic presentation of participants' selection

Supplement: bmjopen-2021-051017supp001_data_supplement.pdf [file bmjopen-2021-051017supp001_data_supplement.pdf]
